# Supplementary material for: Uncemented or cemented revision stems? Analysis of 2,296 first-time hip revision arthroplasties performed due to aseptic loosening, reported to the Swedish Hip Arthroplasty Register
Source: PubMed Central journal article supplement (PMC6746274; doi:10.1080/17453674.2019.1624336), 2019-06-03
Supplement: IORT_A_1624336_SM4533.pdf [file IORT_A_1624336_SM4533.pdf]

## Supplementary data

Table 1. Type of revision stems included in the study

| Type of stem                                                 | Number of stems included in the study |
|--------------------------------------------------------------|---------------------------------------|
| Uncemented stems                                             |                                       |
| Link MP, Waldermar Link GmbH & Co. KG, Hamburg, Germany      | 902                                   |
| Restoration Modular System, Stryker, Kalamazoo, MI, USA      | 233                                   |
| Revitan Revision Hip System, Zimmer Inc, Warsaw, IN, USA     | 284                                   |
| Wagner SL Revision Hip, Zimmer Inc, Warsaw, IN, USA          | 235                                   |
| Cemented stems                                               |                                       |
| Exeter Hip System, Stryker, Kalamazoo, MI, USA               | 418                                   |
| Lubinus SPII, Waldermar Link GmbH & Co. KG, Hamburg, Germany | 716                                   |
| Spectron, Smith and Nephew, Memphis, TN, USA                 | 194                                   |

Table 3. Adjusted risk for re-revision 1st year after index surgery

| Factor                                           | HR (CI)          |
|--------------------------------------------------|------------------|
| Uncemented stem (cemented ref.)                  | 1.3 (1.0–1.6)    |
| Age at index surgery (1 year)                    | 0.97 (0.96–0.99) |
| Concomitant cup revision                         | 0.5 (0.4–0.7)    |
| Diagnosis at primary THA (OA ref.):              |                  |
| Condition after childhood disease                | 0.9 (0.5–1.6)    |
| Fracture                                         | 0.9 (0.6–1.4)    |
| Inflammatory disease                             | 0.7 (0.4–1.2)    |
| Other                                            | 1.1 (0.7–1.9)    |
| Female sex                                       | 0.8 (0.6–1.0)    |
| Head size (22 mm ref.):                          |                  |
| 28                                               | 1.1 (0.7–1.7)    |
| 32                                               | 1.0 (0.6–1.7)    |
| 36                                               | 1.0 (0.5–1.9)    |
| Posterior approach at index surgery <sup>a</sup> | 1.1 (0.9–1.5)    |
| Posterior approach at primary THA <sup>a</sup>   | 1.0 (0.8–1.4)    |

HR (CI): adjusted hazard ratio and 95% confidence interval  
 OA: osteoarthritis.  
<sup>a</sup> Direct lateral approach ref.

Table 4. Adjusted risk for re-revision between 2nd and 13th year after index surgery

| Factor                                           | HR (CI)          |
|--------------------------------------------------|------------------|
| Uncemented stem (cemented ref.)                  | 1.1 (0.8–1.4)    |
| Age at index surgery (1 year)                    | 0.96 (0.95–0.98) |
| Concomitant cup revision                         | 0.5 (0.3–0.6)    |
| Diagnosis at primary THA (OA ref.):              |                  |
| Condition after childhood disease                | 0.7 (0.4–1.5)    |
| Fracture                                         | 0.7 (0.3–1.3)    |
| Inflammatory disease                             | 0.7 (0.4–1.3)    |
| Other                                            | 1.0 (0.5–1.9)    |
| Female sex                                       | 0.7 (0.5–0.9)    |
| Head size (22 mm ref.):                          |                  |
| 28                                               | 1.3 (0.7–2.3)    |
| 32                                               | 1.4 (0.7–2.6)    |
| 36                                               | 1.2 (0.4–3.4)    |
| Posterior approach at index surgery <sup>a</sup> | 1.0 (0.7–1.5)    |
| Posterior approach at primary THA <sup>a</sup>   | 1.4 (0.9–2.1)    |

HR (CI): adjusted hazard ratio and 95% confidence interval  
 OA: osteoarthritis.  
<sup>a</sup> Direct lateral approach ref.

Table 5. Additional sensitivity analysis

| Factor                    | Year after index revision surgery |                                 |
|---------------------------|-----------------------------------|---------------------------------|
|                           | 1st<br>HR (CI)                    | Between 2nd and 13th<br>HR (CI) |
| Only primary cemented THA | 1.2 (0.98–1.6)                    | 1.1 (0.80–1.5)                  |
| Revision stems inserted   |                                   |                                 |
| 1999–2004                 | 1.4 (0.90–2.1)                    | 1.2 (0.75–2.0)                  |
| 2005–2010                 | 1.3 (0.91–1.9)                    | 0.90 (0.58–1.4)                 |
| 2011–2016                 | 1.4 (0.86–2.3)                    | 1.5 (0.89–2.4)                  |

HR (CI): adjusted hazard ratio and 95% confidence interval for re-revision for uncemented revision stems after first time revision compared with cemented revision stems

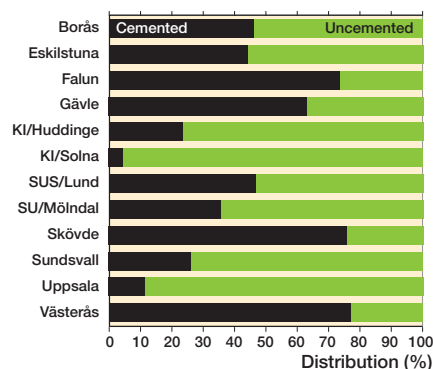

Figure 3. Distribution of usage of uncemented and cemented revision stems at hospitals that inserted more than 100 stems during the study period.
